# Supplementary figures and images for: The HOPS tethering complex is required to maintain signaling endosome identity and TORC1 activity
Source: PubMed Central journal article supplement — J Cell Biol. 2022 Apr 11;221(5):e202109084. doi: 10.1083/jcb.202109084 (PMC9011323; doi:10.1083/jcb.202109084), 2022-04-11

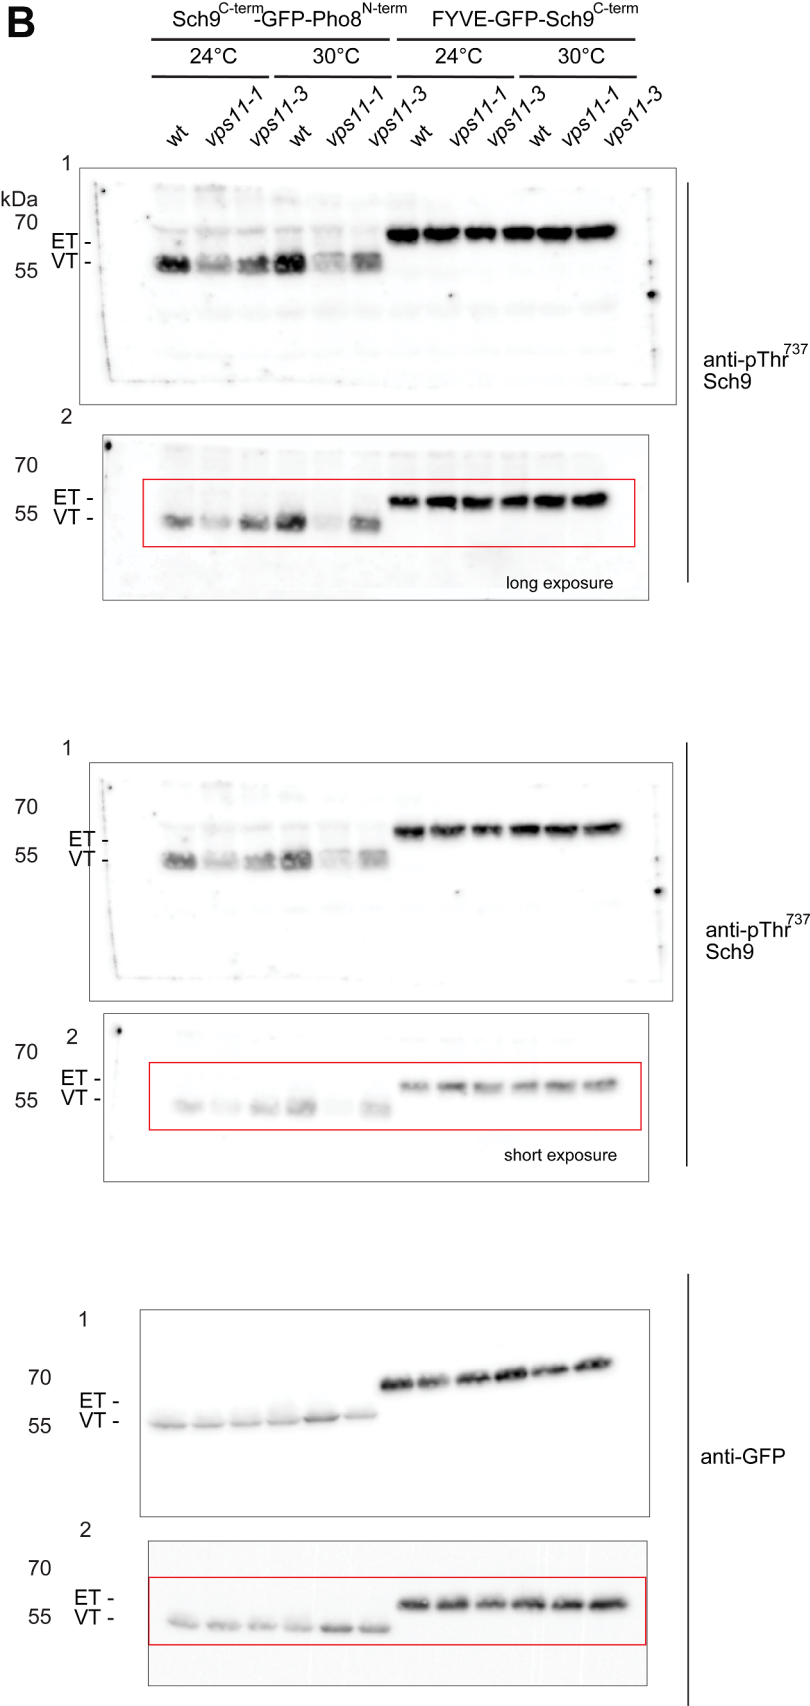

**D** 30°C

1 2 3  
wt vps11-1 vps11-3 wt vps11-1 vps11-3 wt vps11-1 vps11-3

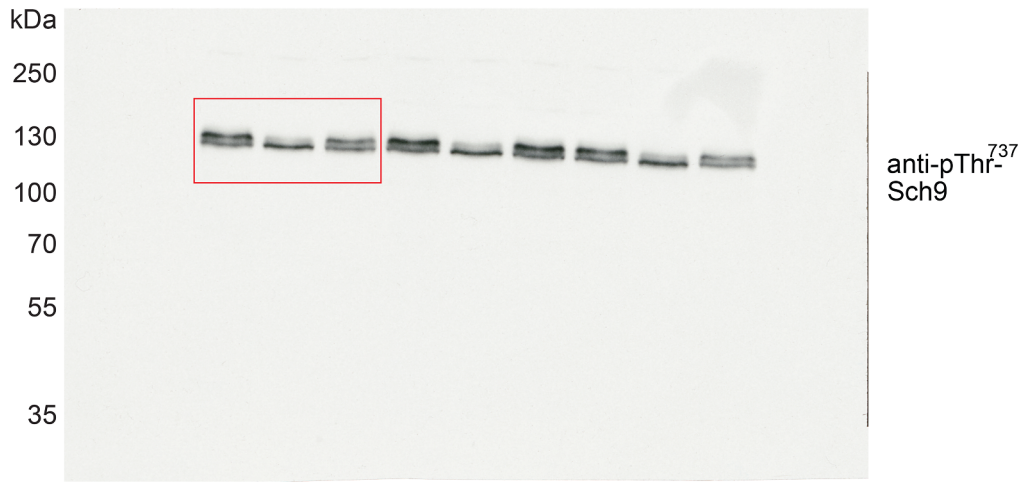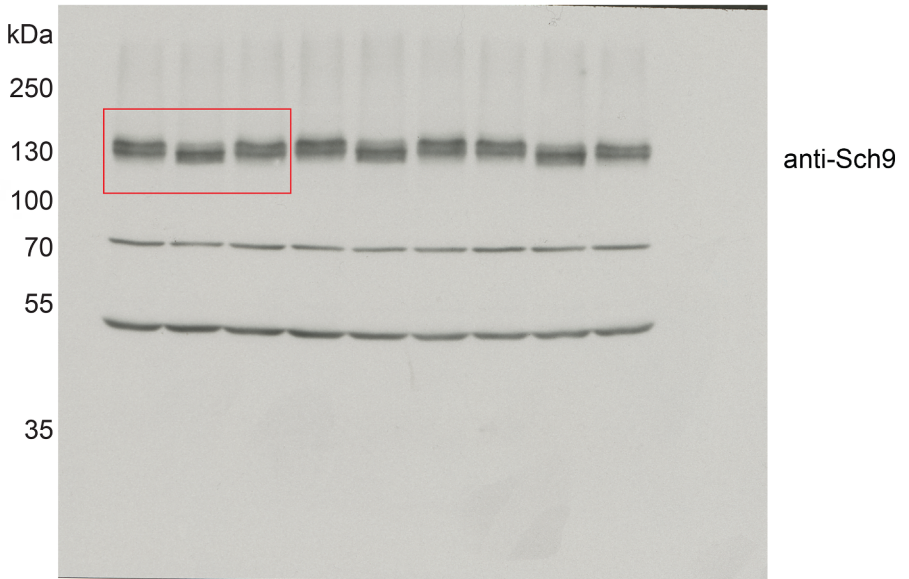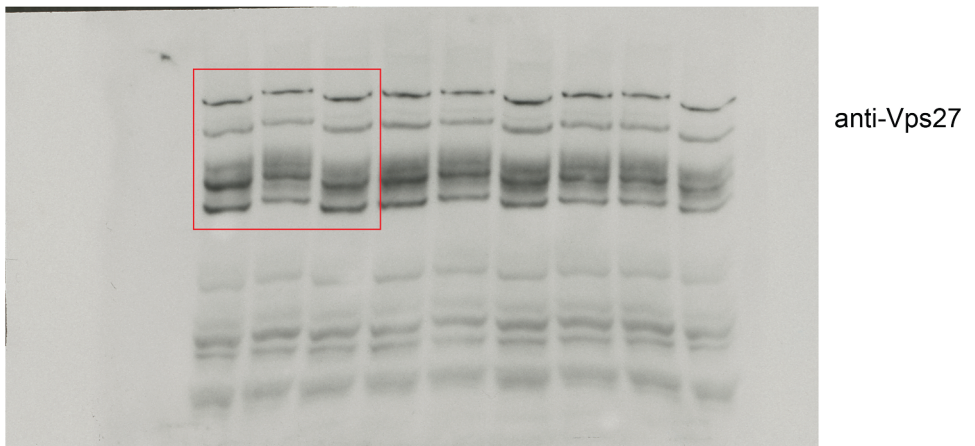

**G**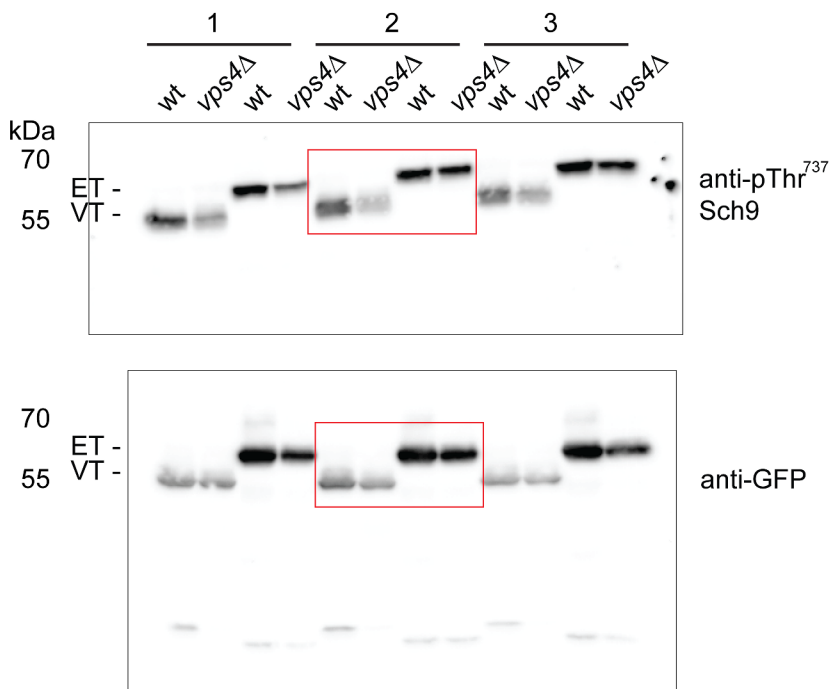

Supplement: JCB_202109084_SourceDataF7.pdf [file JCB_202109084_SourceDataF7.pdf]
